# Supplementary material for: KARAJ: An Efficient Adaptive Multi-Processor Tool to Streamline Genomic and Transcriptomic Sequence Data Acquisition
Source: MDPI journal article supplement (doi:10.3390/ijms232214418), 2022-11-20
Supplement: s1 [file s1]

**Supplementary Table S1: The list of common error messages.**

| <b>Error message</b>                                                                                                                                                | <b>Description</b>                                                                                                       |
|---------------------------------------------------------------------------------------------------------------------------------------------------------------------|--------------------------------------------------------------------------------------------------------------------------|
| “Invalid option, please check help using -h option”                                                                                                                 | The error message states that a wrong option is passed.                                                                  |
| “Value is missing for option [X]”                                                                                                                                   | The error message states that the value is missed for a particular option. X corresponds to any options.                 |
| “One of the obligatory options is missing”                                                                                                                          | The error message states that one of the options -p, -l, -f or -i has not passed.                                        |
| “Conciliatory options have passed”                                                                                                                                  | One of the options -p, -l or -f can be passed at the time.                                                               |
| “No sample found. Either the provided accession number is invalid or raw data was not provided for this record”                                                     | The error message states that provided accession number is not registered on the respective database.                    |
| “The needed memory size for downloading specified datasets is larger than the free space available on the designated local directory. Please change the directory.” | The error message states that there is no adequate space on the designated directory to download all specified datasets. |

**Supplementary Table S2: The list of options and operations.**

| Options | Description                                                                                                                                                                                                                                                                                                                                                                                                                                                                  | Default                                    | Syntax                                                        |
|---------|------------------------------------------------------------------------------------------------------------------------------------------------------------------------------------------------------------------------------------------------------------------------------------------------------------------------------------------------------------------------------------------------------------------------------------------------------------------------------|--------------------------------------------|---------------------------------------------------------------|
| -l      | Passing URL(s)                                                                                                                                                                                                                                                                                                                                                                                                                                                               | empty                                      | <code>./KARAJ.sh -l [URL1<br/>URL2 ... URLn]</code>           |
| -p      | Passing PMCID(s)                                                                                                                                                                                                                                                                                                                                                                                                                                                             | empty                                      | <code>./KARAJ.sh -p<br/>[PMCID1 PMCID2 ...<br/>PMCIDn]</code> |
| -o      | Output working directory                                                                                                                                                                                                                                                                                                                                                                                                                                                     | The current<br>working directory           | <code>./KARAJ.sh -o<br/>[directory/output]</code>             |
| -t      | Specifying type of files formats                                                                                                                                                                                                                                                                                                                                                                                                                                             | KARAJ downloads<br>all of file types       | <code>./KARAJ.sh -t<br/>[bam/vcf/fastq]</code>                |
| -s      | Downloading supplementary tables. KARAJ<br>does not download supplementary data<br>tables                                                                                                                                                                                                                                                                                                                                                                                    | 0                                          | <code>./KARAJ.sh -l [0/1]</code>                              |
| -f      | Passing list of URL(s), PMCID(s) or accession<br>number(s). Value 1 corresponds to a file<br>named "PMCID" for passing a list of PMCIDs.<br>Value 2 corresponds to a file named<br>"ACCESSIONS" for passing a list of accession<br>numbers. Value 3 corresponds to a file<br>named "URLS" for passing a list of URL(s).<br>These files must be created in the working<br>directory. Each line in either "PMCID",<br>"URLS" and "ACCESSIONS" must contain only<br>one entity. | empty                                      | <code>./KARAJ.sh -f<br/>[1/2/3]</code>                        |
| -i      | Passing accession number(s)                                                                                                                                                                                                                                                                                                                                                                                                                                                  | empty                                      | <code>./KARAJ.sh -i<br/>[SRR/SRP/PRJ/PRJNA]</code>            |
| -d      | Selecting accession number(s) to download.<br>Value 1 corresponds to go to selection<br>module before downloading files, (0):<br>downloads all files. This option must be<br>passed along with options -l, -p, -f or -i.                                                                                                                                                                                                                                                     | KARAJ downloads<br>all files.              | <code>./KARAJ.sh -d [1/0]</code>                              |
| -m      | Downloading metadata. This option must be<br>passed along with options -l, -p, -f or -i.                                                                                                                                                                                                                                                                                                                                                                                     | empty                                      | <code>./KARAJ.sh -m<br/>[URL(s)]?</code>                      |
| -h      | Help                                                                                                                                                                                                                                                                                                                                                                                                                                                                         | empty                                      | <code>./KARAJ.sh -h</code>                                    |
| -u      | Usage and examples                                                                                                                                                                                                                                                                                                                                                                                                                                                           | empty                                      | <code>./KARAJ.sh -l<br/>[URL(s)]</code>                       |
| -c      | Number of cores                                                                                                                                                                                                                                                                                                                                                                                                                                                              | Number of<br>accessible cores<br>minus one | <code>./KARAJ.sh -c<br/>[core]</code>                         |
