# Supplementary material for: KARAJ: An Efficient Adaptive Multi-Processor Tool to Streamline Genomic and Transcriptomic Sequence Data Acquisition
Source: Int J Mol Sci. 2022 Nov 20;23(22):14418. doi: 10.3390/ijms232214418 (PMC9694301; doi:10.3390/ijms232214418)
Supplement: Supplementary file 1 [file ijms-23-14418-s001.zip]

Archive with 5 entries (5 files):
- ijms-1889594-supplementary.pdf
- Supplementary_Figure S1.JPG
- Supplementary_Figure S2.JPG
- Supplementary_Figure S3.JPG
- Supplementary_Figure S4.JPG
